# Supplementary material for: A MATE Transporter is Involved in Pathogenicity and IAA Homeostasis in the Hyperplastic Plant Pathogen Pseudomonas savastanoi pv. nerii
Source: PubMed Central journal article supplement (PMC7074806; doi:10.3390/microorganisms8020156), 2020-01-22
Supplement: microorganisms-08-00156-s001.pdf [file microorganisms-08-00156-s001.pdf]

**Table S1.** Bacterial strains, mutants and plasmids used in this study.

| Strain/Plasmid                                            | Relevant characteristics <sup>a</sup>                                                                                                                        | Reference/Source <sup>b</sup> |
|-----------------------------------------------------------|--------------------------------------------------------------------------------------------------------------------------------------------------------------|-------------------------------|
| <b>Strain</b>                                             |                                                                                                                                                              |                               |
| <i>E. coli</i> TOP10                                      | F-, mcrA, Δ(mrr-hsdRMS-crBC) Φ80 lacZΔM15<br>ΔlacX74 recA1 araD139 Δ(araleu)7697 galU galK rpsL<br>(StrR) endA1 nupG                                         | Invitrogen, Carlsbad, USA     |
| <i>E. coli</i> ER2925                                     | ara-14 leuB6 fhuA31 lacY1 tsx78 glnV44 galK2 galT22<br>mcrA dcm-6 hisG4 rfbD1 R(zgb210::Tn10)TetS endA1<br>rpsL136 dam13::Tn9 xylA-5 mtl-1 thi-1 mcrB1 hsdR2 | NEB, Hertfordshire, UK        |
| <i>P. savastanoi</i> pv. <i>nerii</i><br>( <i>Psn23</i> ) | Wild type                                                                                                                                                    | LPVM collection [30]          |
| <i>Psn23_ΔiaaM</i>                                        | <i>iaaM</i> in-frame deletion mutant of <i>Psn23</i>                                                                                                         | [17]                          |
| <i>Psn23_ΔiaaL</i>                                        | <i>iaaL</i> in-frame deletion mutant of <i>Psn23</i>                                                                                                         | [17]                          |
| <i>Psn23_ΔmatE</i>                                        | <i>matE</i> in-frame deletion mutant of <i>Psn23</i>                                                                                                         | This study                    |
| <i>Psn23_pT3-matE</i>                                     | Gm <sup>R</sup> , lacZ, mcs, <i>hrpA</i> _promoter+ <i>matE</i>                                                                                              | This study                    |
| <i>Psn23_D182A</i>                                        | <i>matE</i> replaced mutant (Asp182Ala) of <i>Psn23</i>                                                                                                      | This study                    |
| <i>Psn23_Y200A</i>                                        | <i>matE</i> replaced mutant (Tyr200Ala) of <i>Psn23</i>                                                                                                      | This study                    |
| <i>Psn23_T17035A</i>                                      | <i>matE</i> replaced mutant (Thr170Ala, Thr173Ala and<br>Thr175Ala) of <i>Psn23</i>                                                                          | This study                    |
| <b>Plasmid</b>                                            |                                                                                                                                                              |                               |
| <i>pK18-ΔhrpA</i>                                         | pK18mobsacB derivative, in-frame deletion of the<br><i>hrpA</i> gene (273 bp), Km <sup>R</sup>                                                               | [17]                          |
| <i>pK18-ΔmatE</i>                                         | pK18mobsacB derivative, in-frame deletion of the<br><i>matE</i> gene (1113 bp), Km <sup>R</sup>                                                              | This study                    |
| <i>pK18-matE</i> (D182A)                                  | pK18mobsacB derivative, <i>matE</i> gene replaced in amino<br>acid position 182 (Asp → Ala), Km <sup>R</sup>                                                 | This study                    |
| <i>pK18-matE</i> (Y200A)                                  | pK18mobsacB derivative, <i>matE</i> gene replaced in amino<br>acid position 200 (Tyr → Ala), Km <sup>R</sup>                                                 | This study                    |
| <i>pK18-matE</i> (T17035A)                                | pK18mobsacB derivative, <i>matE</i> gene replaced in amino<br>acid positions 170, 173 and 175 (Thr → Ala), Km <sup>R</sup>                                   | This study                    |
| <i>pLPVM-T3A</i>                                          | Gm <sup>R</sup> , lacZ, mcs, <i>hrpA</i> _promoter+ <i>gfp</i>                                                                                               | [33]                          |
| <i>pLPVM-matE</i>                                         | Gm <sup>R</sup> , lacZ, mcs, <i>hrpA</i> _promoter+ <i>matE</i>                                                                                              | [33]                          |

<sup>a</sup> Gm<sup>R</sup>, gentamicin resistance; Km<sup>R</sup>, kanamycin resistance. <sup>b</sup> LPVM Laboratorio di Patologia Vegetale Molecolare (University of Florence).

**Table S2.** Primers used in this study.

| <b>Primer name</b>  | <b>Primer sequence (5'-3')<sup>a</sup></b> |
|---------------------|--------------------------------------------|
| matE_PstI_For       | TTT <u>CTGCAGT</u> CCAGAACACAGACATT        |
| matE_cross_Rev      | CCGGATCCACTGAAACTTGCTATGCCAAGAATCATC       |
| matE_cross_For      | AAGTTTCAGTGGATCCGGCGAGATCCATTCAATAGG       |
| matE_EcoRI_Rev      | TTTGAATTC <u>TAATCGTGT</u> TGTTTCAGAG      |
| pT3_matE_BamHI_For  | TTTGGATCCATGGTAGTTATCAA                    |
| pT3_matE_KpnI_Rev   | AAAGGTACCTTATGAGTACTCCTGT                  |
| pK18_matE_PstI_For  | TTTCTGCAGATGGTAGTTATCAA                    |
| pK18_matE_EcoRI_Rev | TTTGAATTC <u>TTATGAGT</u> ACTCCTGT         |
| matE_D182A_For      | GTTGCCATCGCAGCCCCGCTGCTTATTG               |
| matE_D182A_Rev      | CAATAAGCAGCGGGGCTGCGATGGCAAC               |
| matE_Y200A_For      | CGGCATCGCCGCCCTGATATCGAG                   |
| matE_Y200A_Rev      | CTCGATATCAGGGCGGGCATGCCG                   |
| matE_T17035A_For    | GTGGGCCCTGCTGGCGGGCGGGCGGC                 |
| matE_T17035A_Rev    | GCCGCCCGCCAGCAGGGCCCCAC                    |
| hrpA_RT_For         | GCAGGGTATCAACAGCGTCAAG                     |
| hrpA_RT_Rev         | CCGTTCTCTCGTTCGCAAGT                       |
| hrpRS_RT_For        | ACCCGCAGAGTGAAGAAC                         |
| hrpRS_RT_Rev        | CGCTTGAGTGACTGTTGAATC                      |
| iaaM_RT_For         | TTCACTGCCTCACGGATAGCG                      |
| iaaM_RT_Rev         | CGACTGGATGGTGGTGGGAAG                      |
| iaaL_RT_For         | ACCTCAGCAGCGGCGTAAAG                       |
| iaaL_RT_Rev         | TCGTCCGTGTGTATGGCAGTTC                     |
| iaaH_RT_For         | TGATGATGCCGATATTGTC                        |
| iaaH_RT_Rev         | AAGGTGGTGATTGATGATG                        |
| matE_RT_For         | CATCGCAGCCATTACG                           |
| matE_RT_Rev         | AGCCTGAAGAACCTGTC                          |

<sup>a</sup> The nucleotides underlined refer to digestion cutting sites for molecular cloning.
